# Supplementary material for: Intracellular alkalization causes pain sensation through activation of TRPA1 in mice
Source: JCI journal article supplement (doi:10.1172/jci35957), 2008-11-13
Supplement: sd1 [file 1]

# Suppl. Fig. 1

Fujita *et al.*

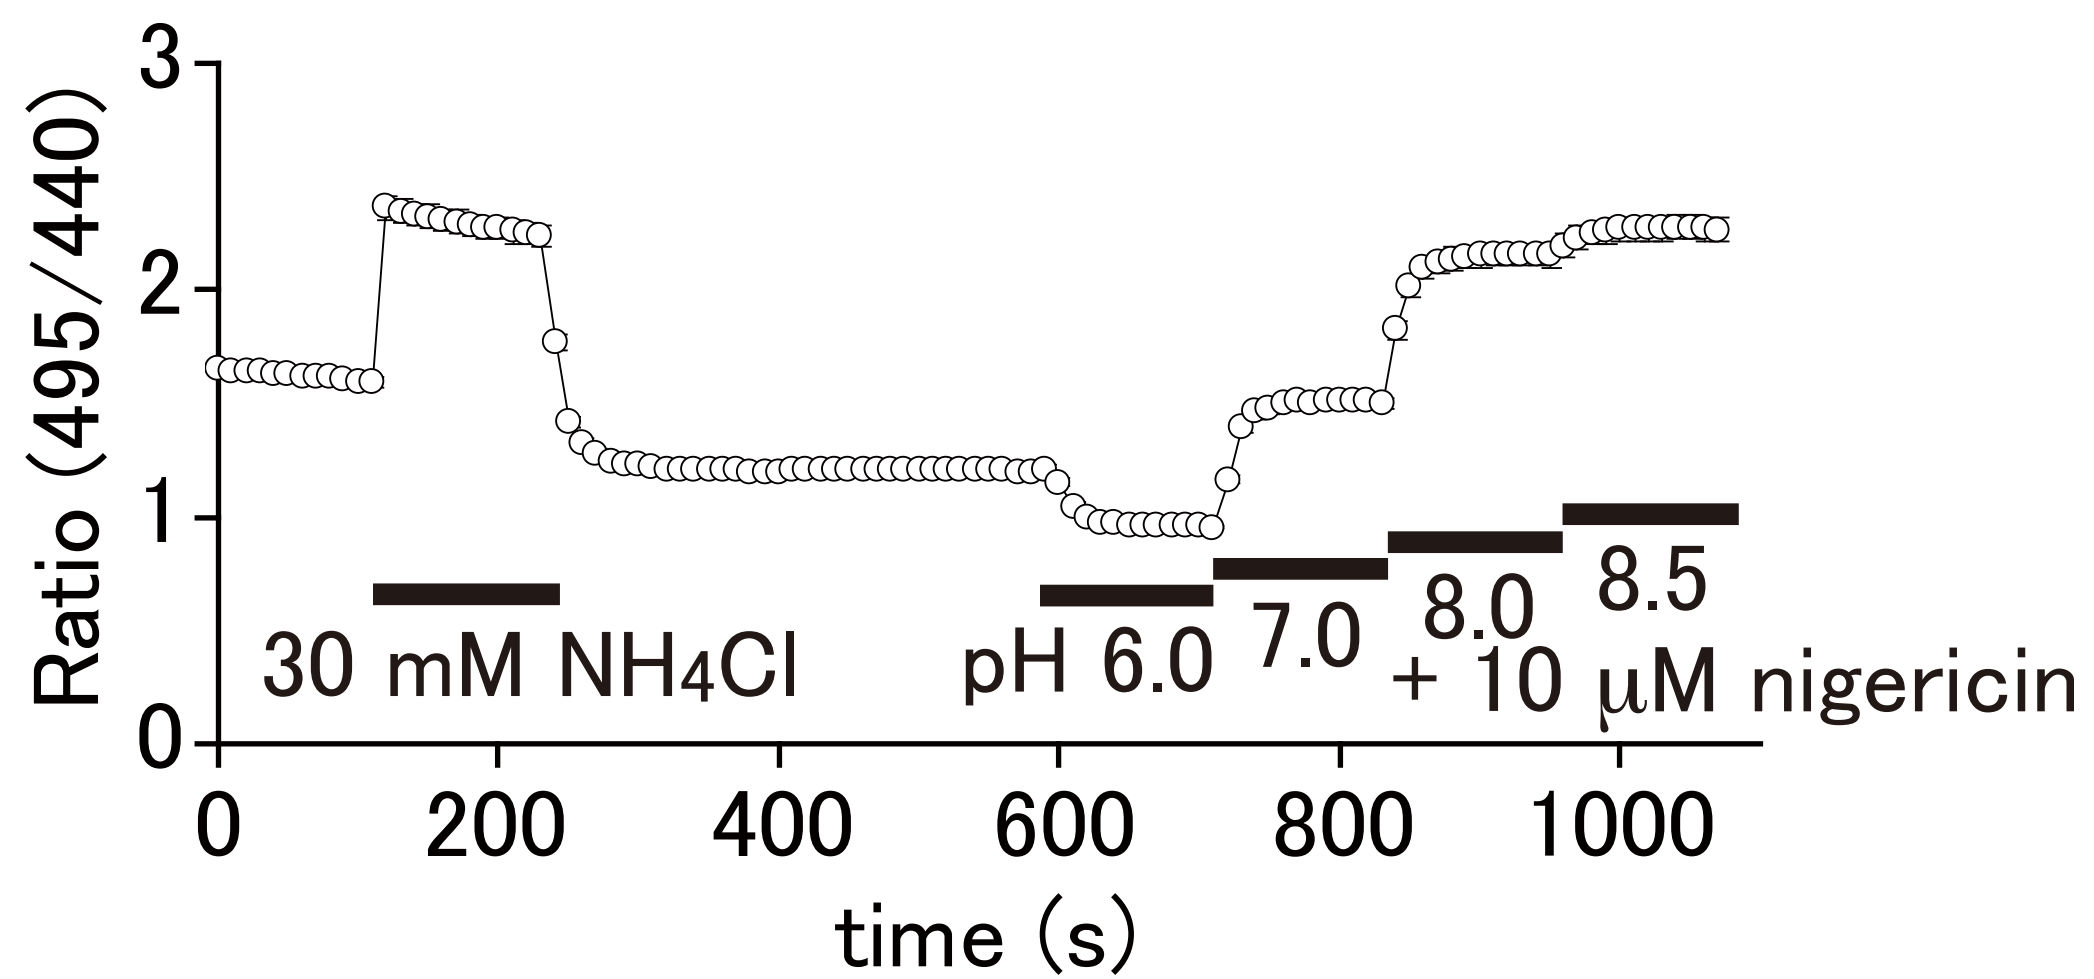

# Sup. 2

Fujita *et al.*

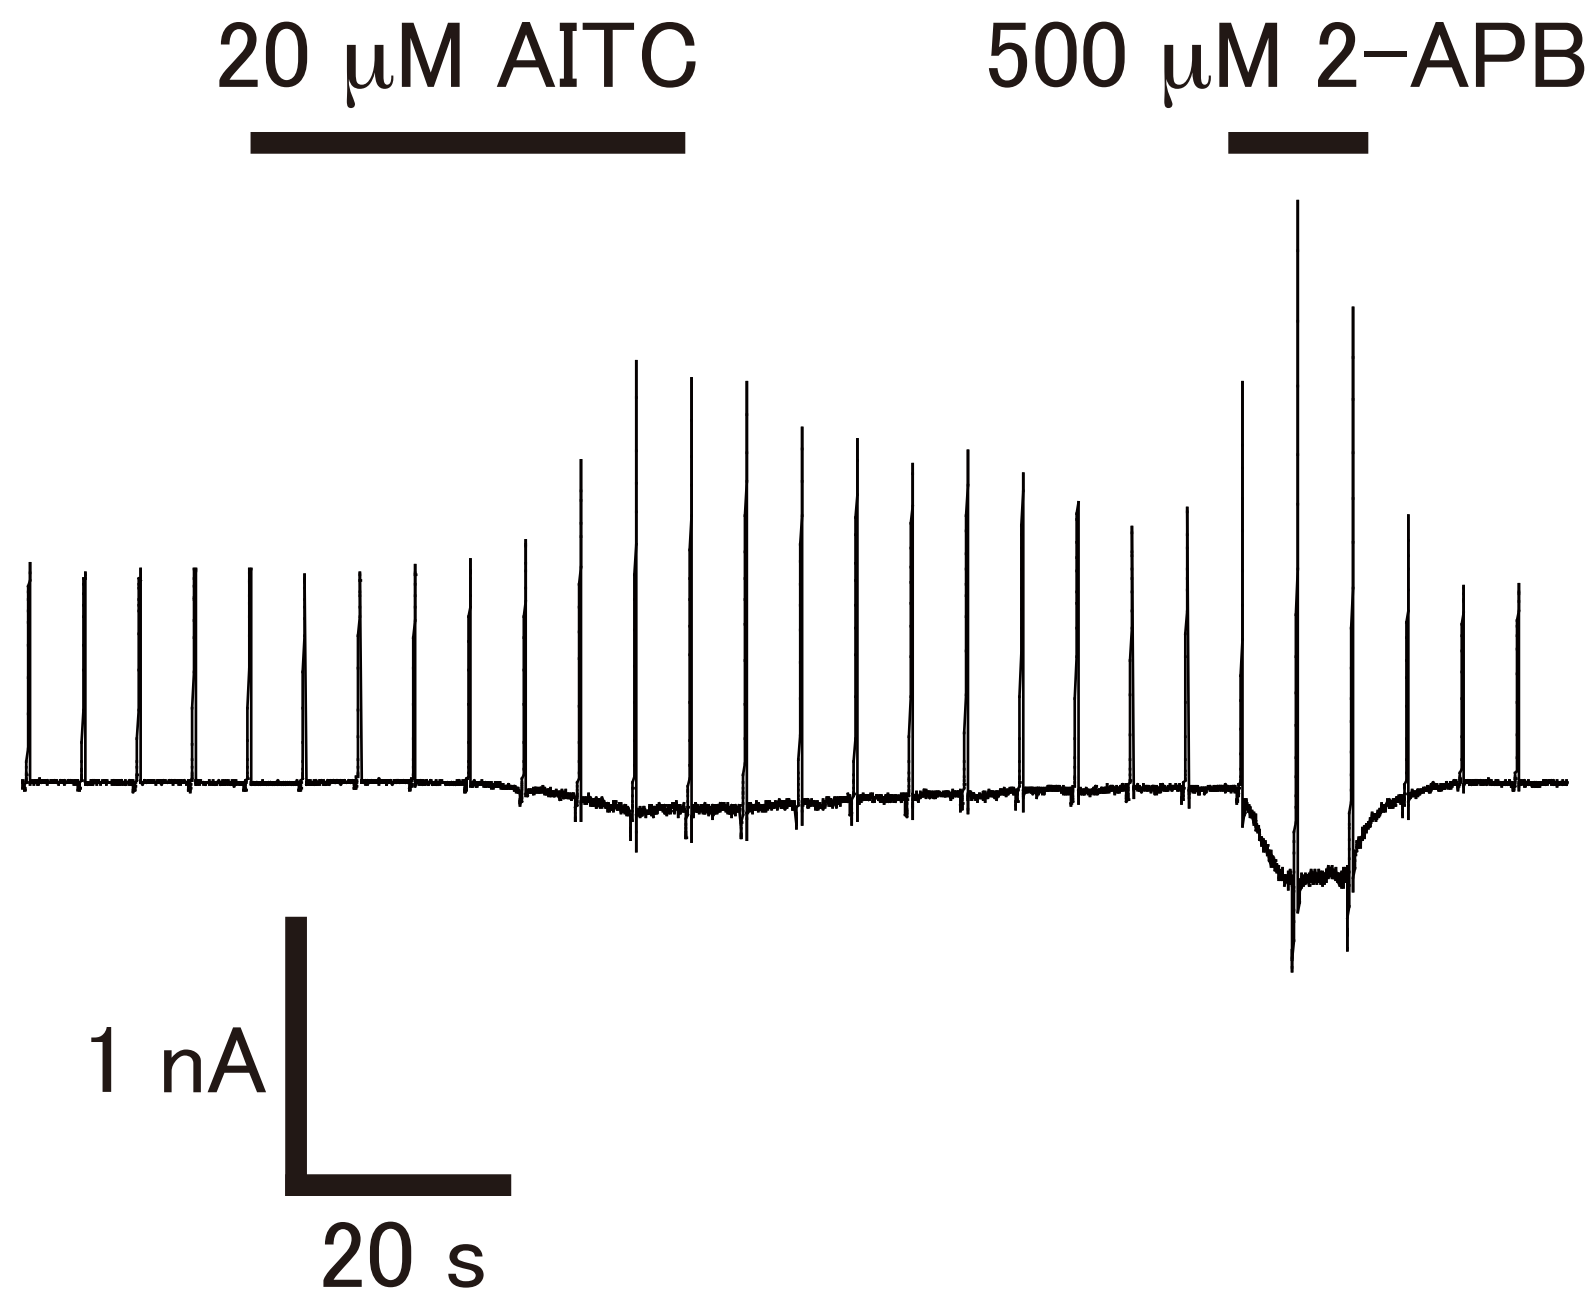

# Suppl. Figure 3

Fujita *et al.*

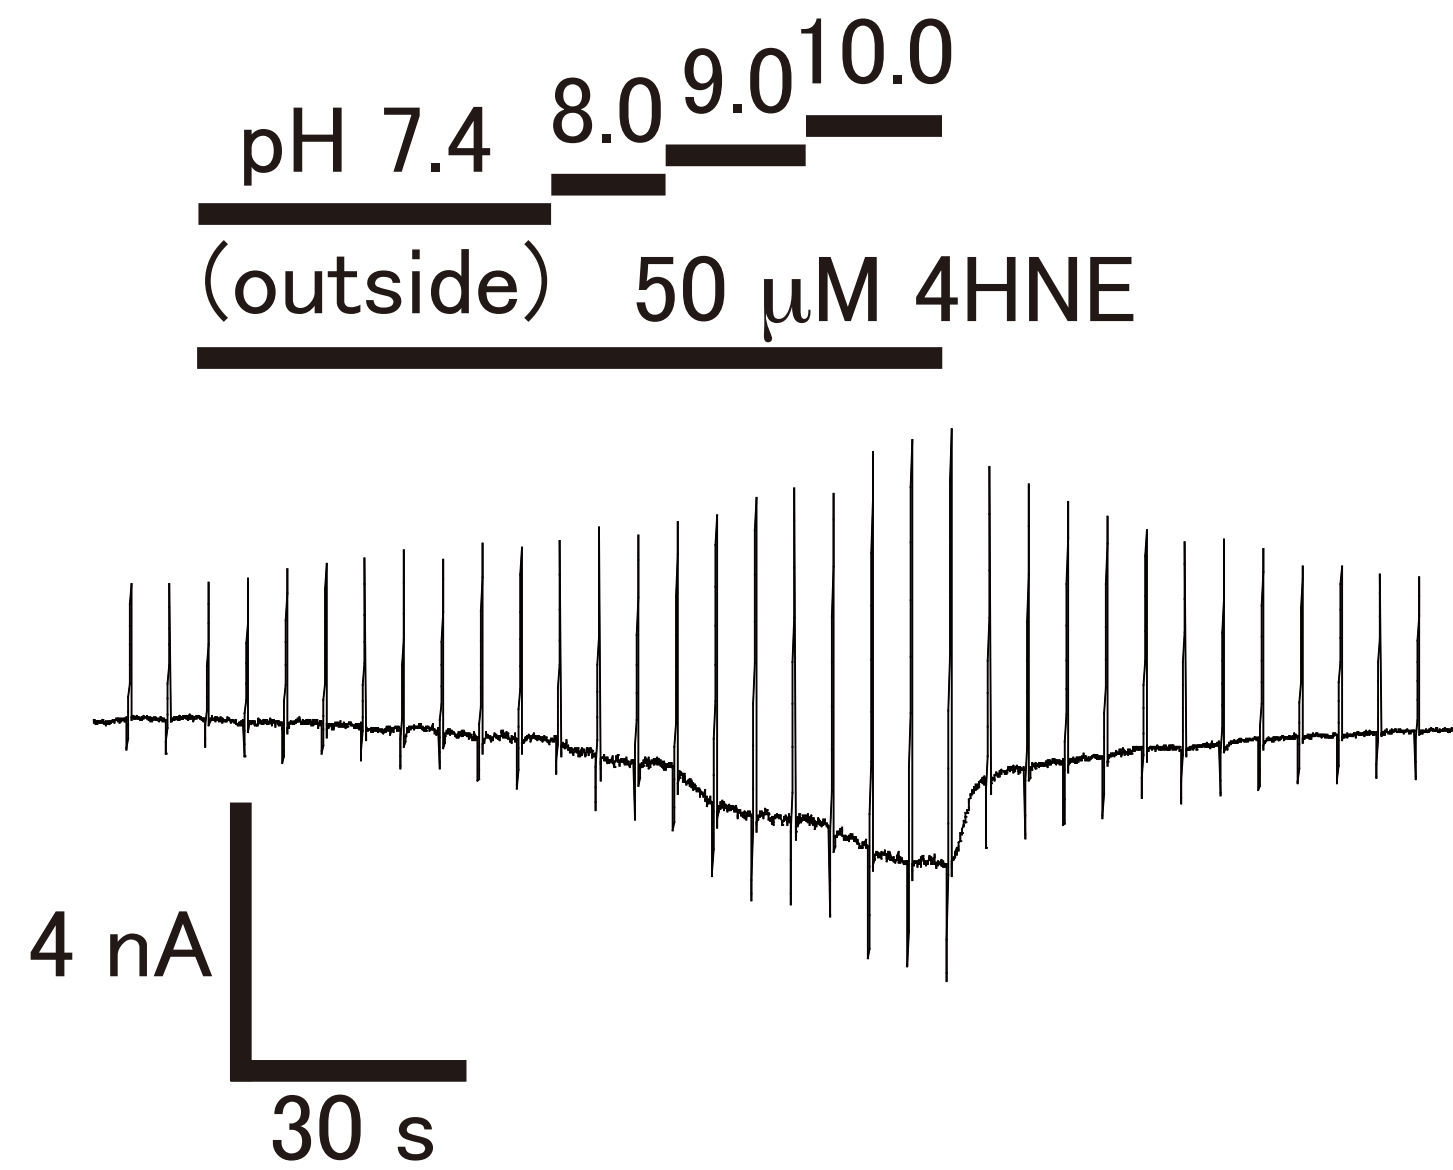

# Sup. 4 (1 column)

Suppl. Figure 4

Fujita *et al.*

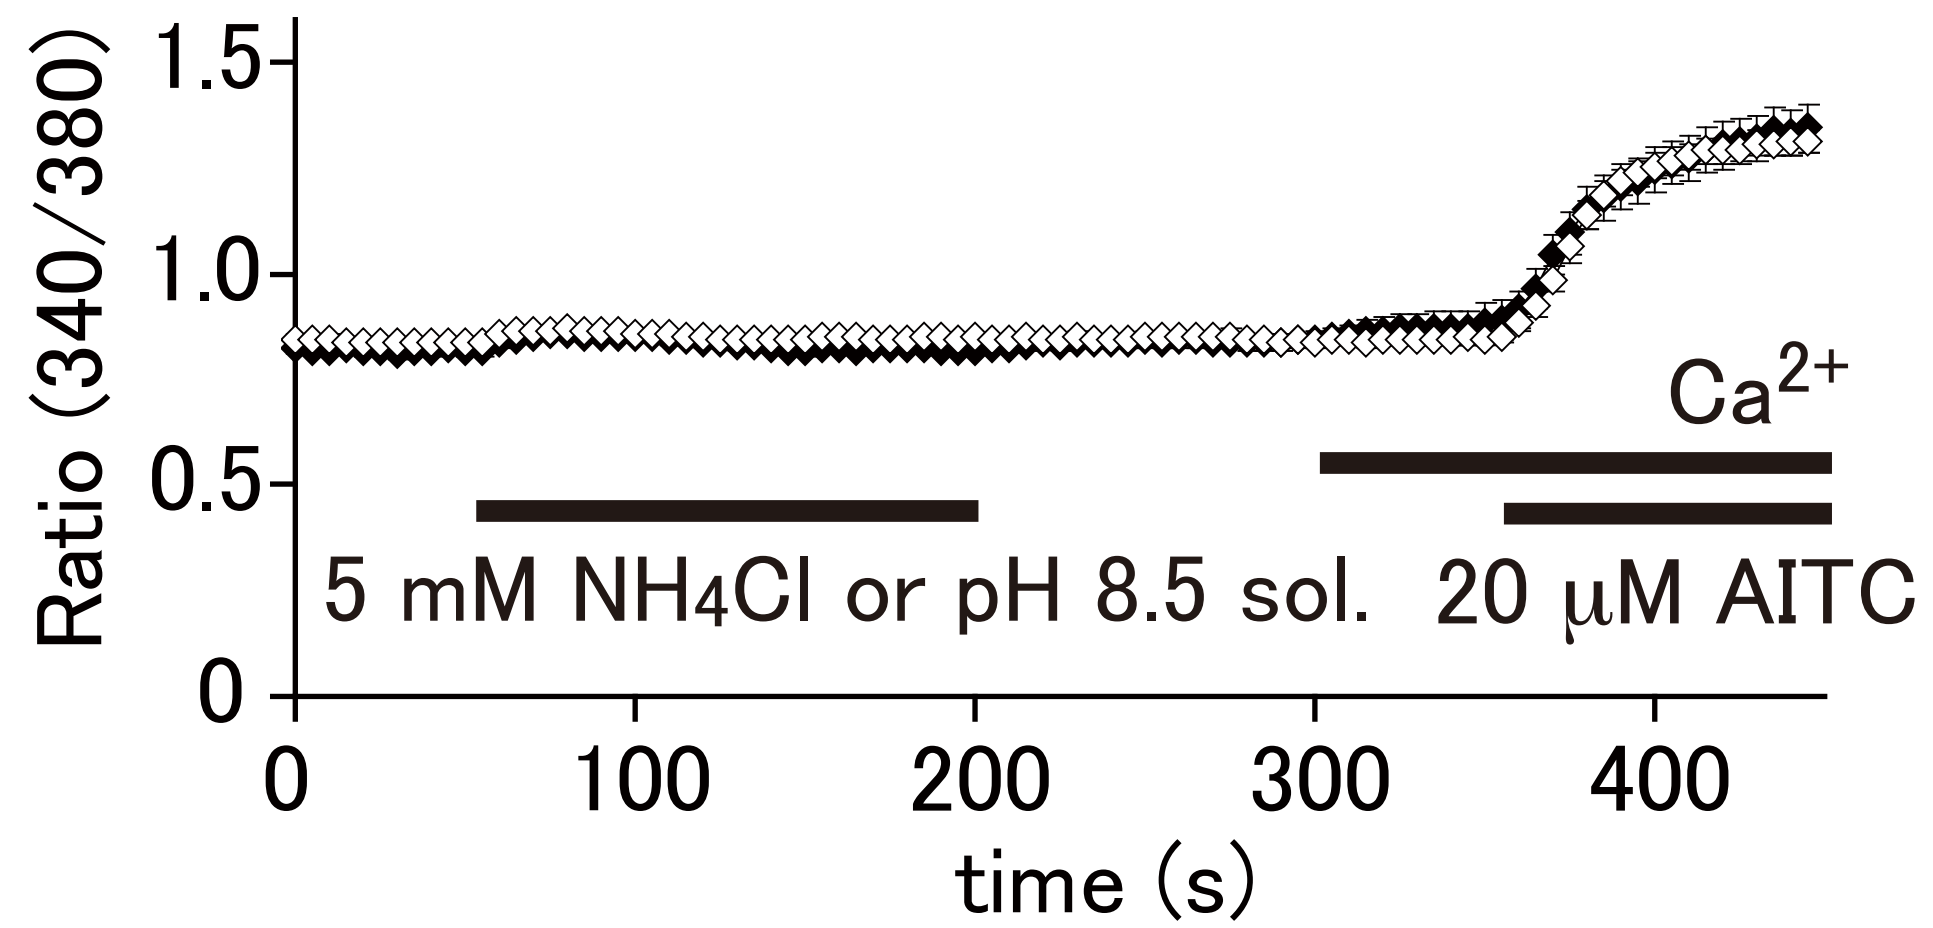

# Suppl. Figure 5

Fujita *et al.*

## A

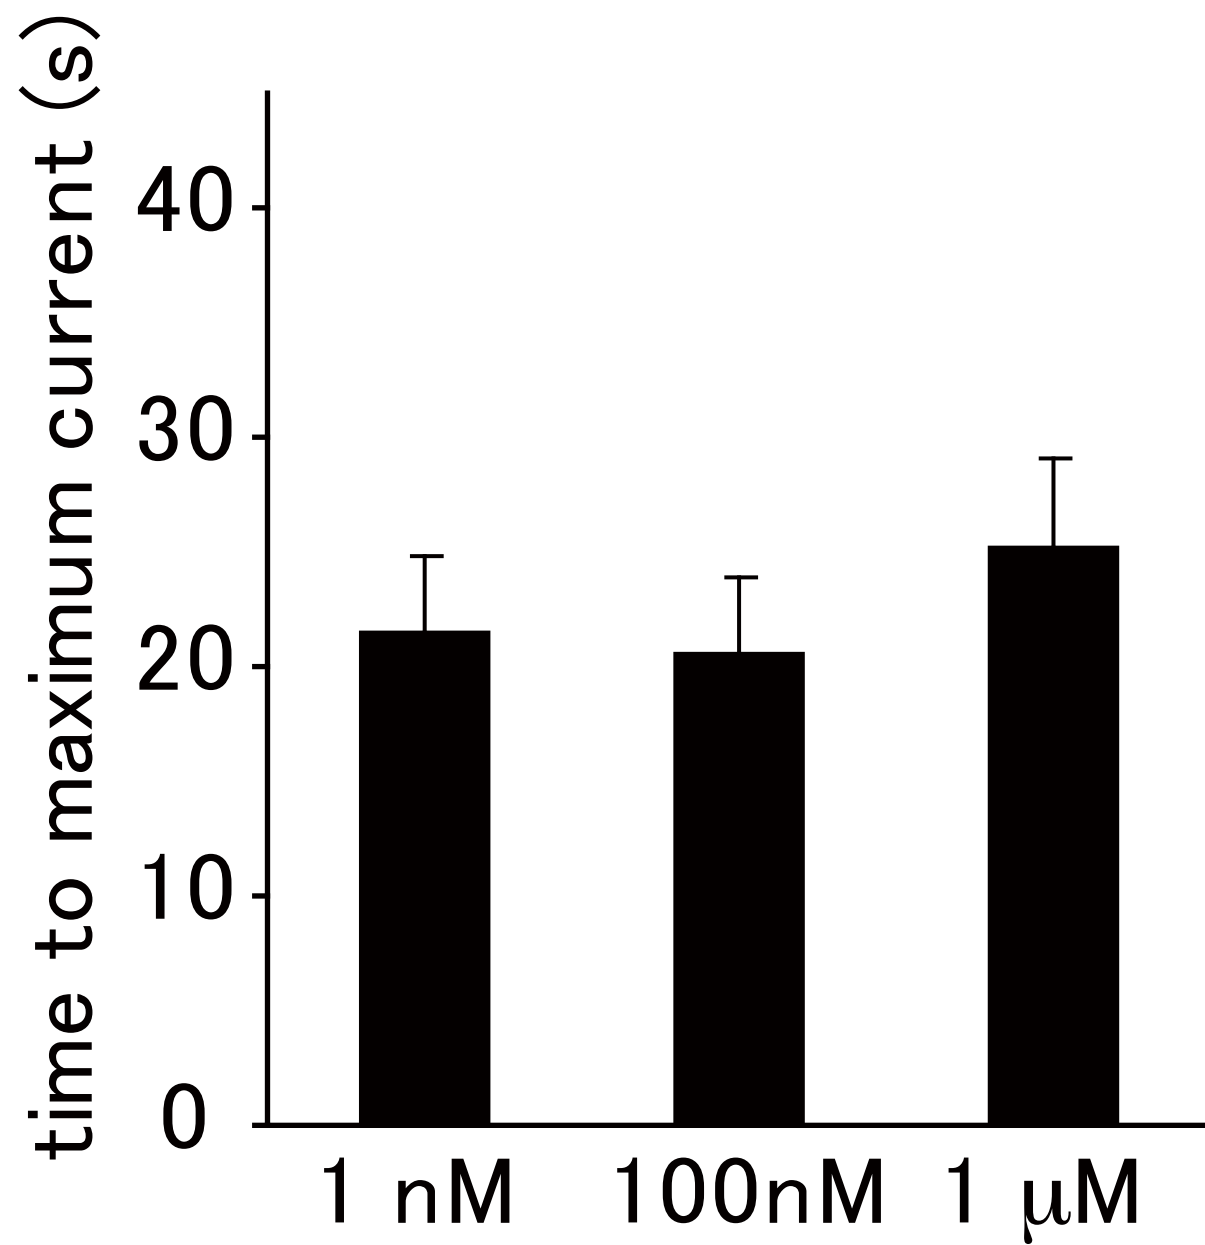

## B

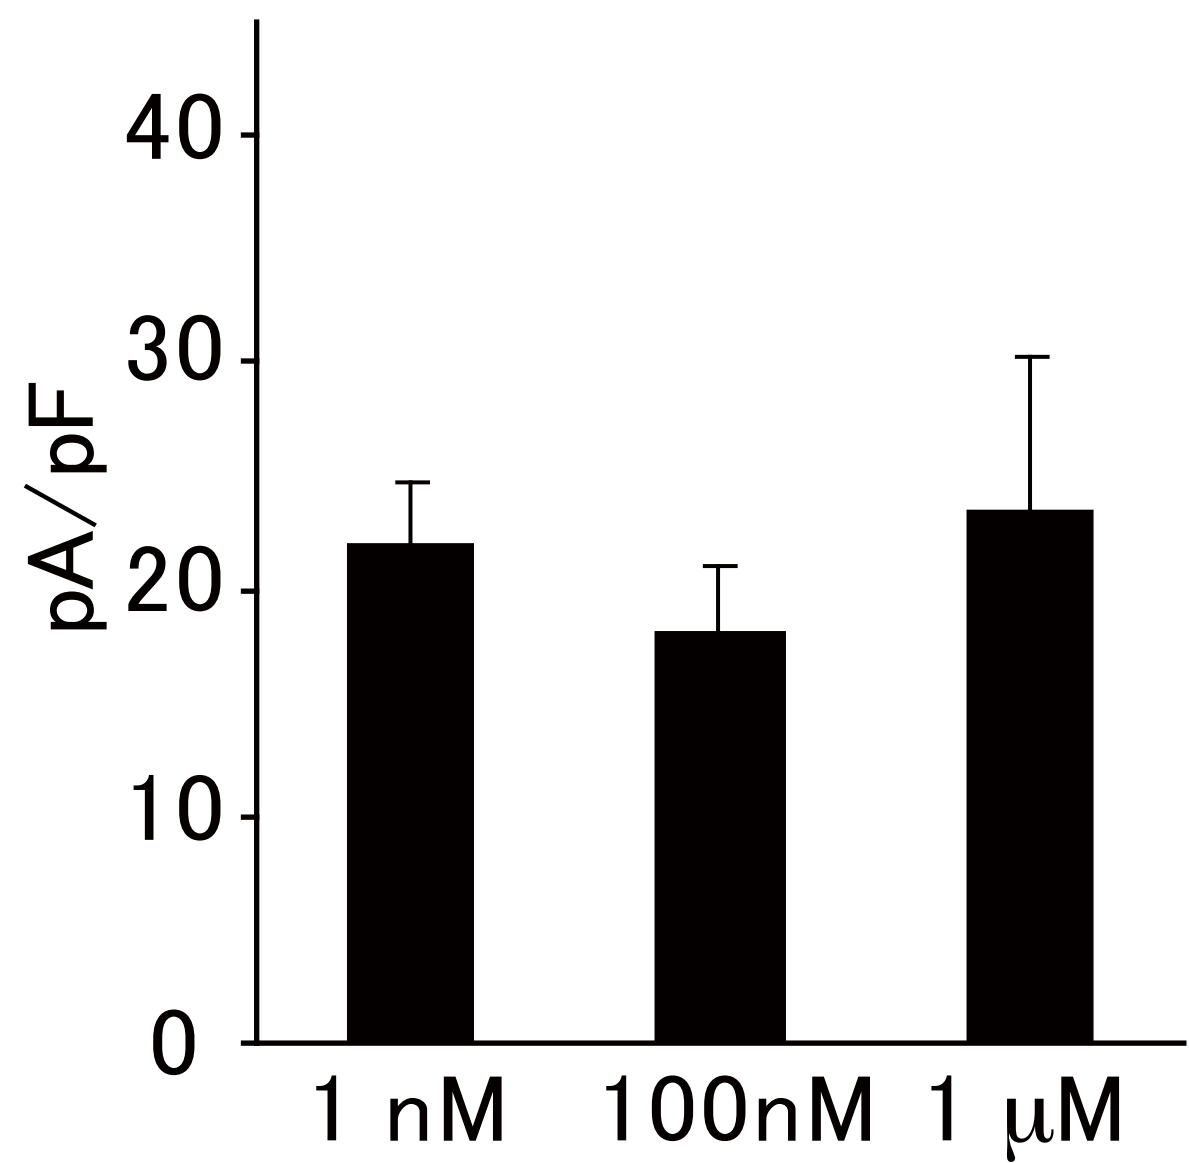

# Suppl. Figure 6

Fujita *et al.*

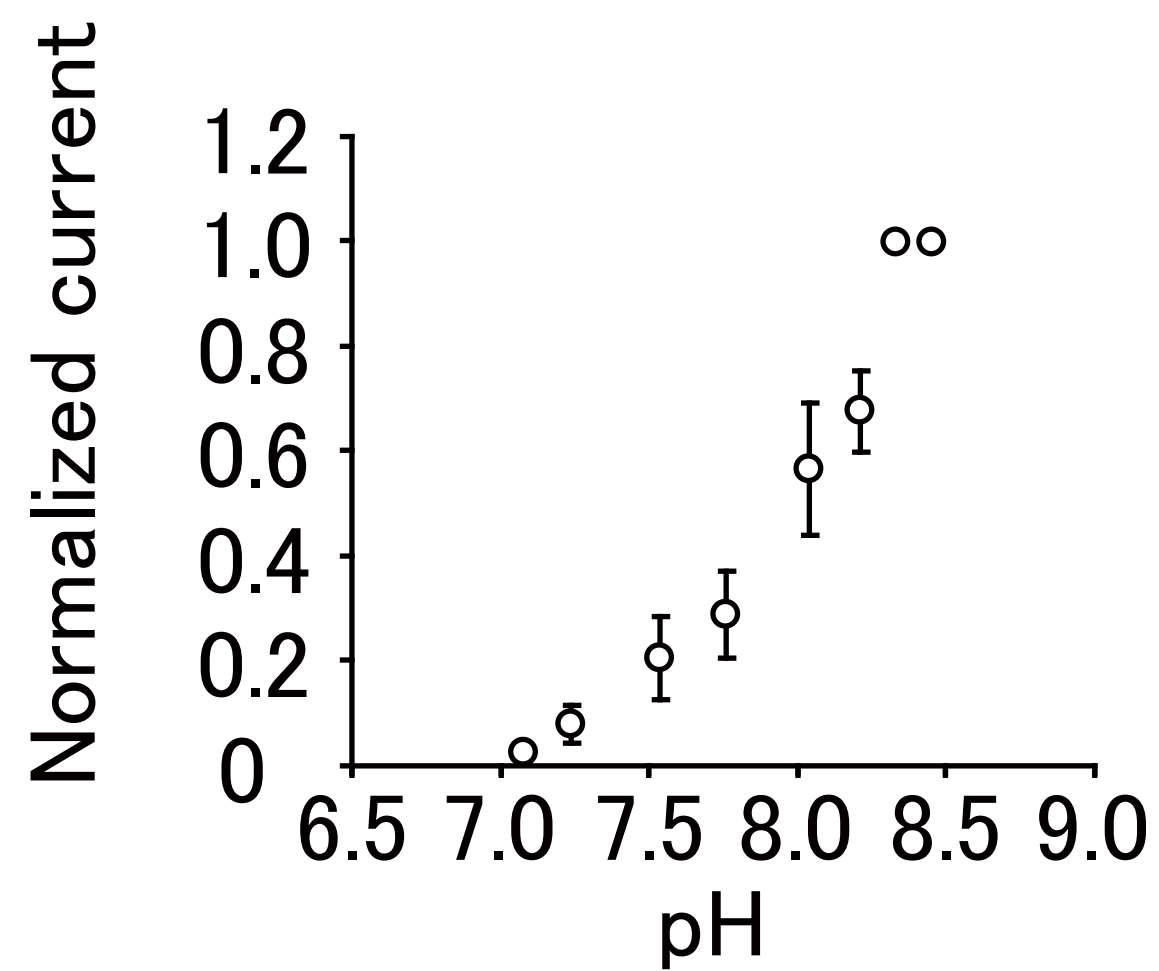

**Supplementary Figure 1.** Ammonium chloride (30 mM) or alkaline pH solutions (n = 27) causes an increase in intracellular pH (indicated by the ratio (488/440) of BCECF) in HEK293 cells expressing mouse TRPA1 in the presence of extracellular  $\text{Ca}^{2+}$ . Each standard solution contained 10  $\mu\text{M}$  nigericin. Horizontal bars indicate the duration of applied stimulus.

**Supplementary Figure 2.** A representative whole cell current trace in response to AITC (20  $\mu\text{M}$ ) or 2-aminoethoxydiphenyl borate (2-APB, 500  $\mu\text{M}$ ) in the cell expressing mutant TRPA1-2C in the presence of extracellular  $\text{Ca}^{2+}$ .  $V_h = -60$  mV. Bars indicate duration of the compound application.

**Supplementary Figure 3.** A representative current trace activated by 4-hydroxy-2-nonenal (50  $\mu\text{M}$ ) in the bath solution with different pH values.

**Supplementary Figure 4.** Tris buffer (pH 8.5) (filled squares, n = 34) or 5 mM ammonium chloride (opened squares, n = 34) did not cause an increase in cytosolic  $\text{Ca}^{2+}$  concentration in HEK293 cells expressing mouse TRPA1 in the absence of extracellular  $\text{Ca}^{2+}$ . TRPA1 response was confirmed by application of 20  $\mu\text{M}$  AITC in the presence of 2 mM extracellular  $\text{Ca}^{2+}$ . Horizontal bars indicate the duration of applied stimulus.

**Supplementary Figure 5. A,** Comparison of times to maximum current responses evoked by 30 mM ammonium chloride using the pipette solutions containing different

Ca<sup>2+</sup> concentrations (1 nM, 100 nM, 1  $\mu$ M) in HEK293 cells expressing TRPA1. **B**, Comparison of current densities of the responses evoked by 30 mM ammonium chloride using the pipette solutions containing different Ca<sup>2+</sup> concentrations (1 nM, 100 nM, 1  $\mu$ M) in HEK293 cells expressing TRPA1.

**Supplementary Figure 6.** A pH-response profile of intracellular pH-activated TRPA1-mediated inward currents in HEK293 cells exposed to NH<sub>4</sub>Cl.

The pH-response profile was generated from the data in Figures 1C and 3C.
